# Supplementary material for: Induction of antiviral genes by the tumor microenvironment confers resistance to virotherapy
Source: PubMed Central journal article supplement — Sci Rep. 2013 Aug 7;3:2375. doi: 10.1038/srep02375 (PMC3736178; doi:10.1038/srep02375), 2013-08-07
Supplement: srep02375-s1.pdf [file srep02375-s1.pdf]

**Induction of antiviral genes by the tumor microenvironment  
confers resistance to virotherapy**

Yu-Ping Liu<sup>1</sup>, Lukkana Suksanpaisan<sup>1</sup>, Michael B Steele<sup>1</sup>,  
Stephen J Russell<sup>1,2</sup>, Kah-Whye Peng<sup>1,3</sup>

<sup>1</sup>Department of Molecular Medicine, <sup>2</sup>Division of Hematology,

<sup>3</sup>Department of Obstetrics and Gynecology, Mayo Clinic, Rochester, Minnesota

Corresponding Author:

Kah-Whye Peng, Ph.D.

Mayo Clinic

200 First Street SW

Rochester MN 55905

Email: [peng.kah@mayo.edu](mailto:peng.kah@mayo.edu)

**Supplementary Figure S1- Full length bolts for showing the presence or absence anti-viral proteins**

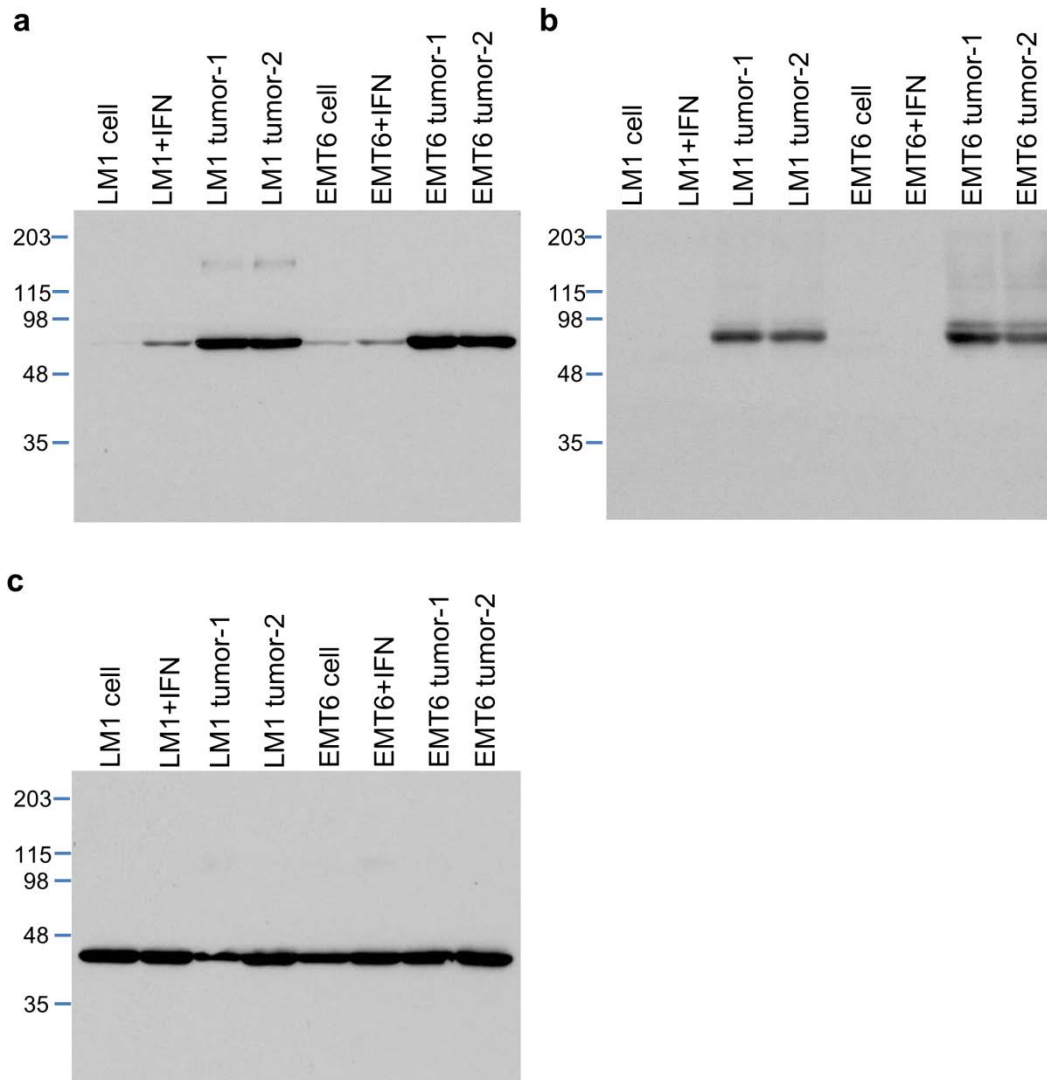

Western blot analysis showing the presence or absence of two anti-viral proteins, OAS2 **(a)** and Mx2 **(b)**, and actin **(c)** in the LM1 and EMT6 cells and tumors. Equivalent amount of protein (20  $\mu$ g) was loaded for each lane.
